# Supplementary material for: Convolutional neural network model based on radiological images to support COVID-19 diagnosis: Evaluating database biases
Source: PubMed Central journal article supplement (PMC7920391; doi:10.1371/journal.pone.0247839), 2021-03-01
Supplement: pone.0247839.s001.pdf [file pone.0247839.s001.pdf]

# Dataset information

---

Creation date: jun-12-2020

## Dataset versions for our research

Below, the dataset versions we used in our paper are listed, which were the most up-to-date available versions at the time of dataset creation. We provide the source links and, when possible, specific links to the used versions.

- covid-chestxray-dataset
  - [GitHub repository](#)
  - Commit hash: [9b9c2d5f175107d211d1a62ce9b317509b50f855](#)
  - Last change: jun-12-2020
- Figure1
  - [GitHub repository](#)
  - Commit hash: [95bb569e55f4110d3b734c0f355340e04e16989a](#)
  - Last change: may-08-2020
- Actualmed:
  - [GitHub repository](#)
  - Commit hash: [27240dd8dec9454bc97f9f3c0c432ef434de2517](#)
  - Last change: may-05-2020
- RSNA Pneumonia Detection Challenge
  - [Kaggle dataset](#) - Stage 2 update.
  - Download date: may-14-2020
- COVID-19 Radiography Database
  - [Kaggle dataset](#) - Version 1
  - Download date: may-14-2020
- Large Dataset of Labeled Optical Coherence Tomography (OCT) and Chest X-Ray Images
  - [Mendeley dataset](#)
  - Version 3. DOI: [10.17632/rscbjbr9sj.3](#)
  - published: jun-01-2018

## Steps to create an up-to-date version of the dataset

For creating an up-to-date version of such dataset, one can follow the steps below.

1. Download source data.
  - [covid-chestxray-dataset](#)
  - [Figure1](#)
  - [Actualmed](#)
  - [RSNA Pneumonia Detection Challenge](#)
  - [COVID-19 Radiography Database](#)
  - [Large Dataset of Labeled Optical Coherence Tomography \(OCT\) and Chest X-Ray Images](#)
2. Select and add images to the new dataset.
  - No finding

- covid-chestxray-dataset
  - Figure1
  - RSNA Pneumonia Detection Challenge
  - Large Dataset of Labeled Optical Coherence Tomography (OCT) and Chest X-Ray Images
  - COVID-19
    - covid-chestxray-dataset
    - Figure1
    - Actualmed
    - COVID-19 Radiography Database
  - Pneumonia
    - Figure1
    - RSNA Pneumonia Detection Challenge
    - COVID-19 Radiography Database
    - Large Dataset of Labeled Optical Coherence Tomography (OCT) and Chest X-Ray Images
3. Resize all images to desired dimensions.
- 512x512
  - 768x768
  - 1024x1024
  - 1536x1536
4. Perform data augmentation.
- Flip
  - Rotate left/right
  - Add noise
    - Gaussian noise
    - Laplacian noise
    - Poisson noise

## Datasets used for comparison

In order to create the datasets we used for comparison in the paper, the instructions below can be followed.

- Dataset without data augmentation: follow the steps above, excluding step 4.
- COVIDx: [Instructions for creating COVIDx v3](#).
